# Supplementary material for: Potential of Trichoderma virens HZA14 in Controlling Verticillium Wilt Disease of Eggplant and Analysis of Its Genes Responsible for Microsclerotial Degradation
Source: MDPI journal article supplement (doi:10.3390/plants12213761), 2023-11-03
Supplement: s1 [file s1]

**Table S1.** The summary of filtrating of data from 5 samples

| Sample  | Low-quality Reads Number | Low-quality Reads Rate (%) | Ns Reads Number | Ns Reads Rate (%) | Adapter Polluted Reads Number | Adapter Polluted Reads Rate (%) | Raw Q30 Bases Rate (%) | Clean Q30 Bases Rate (%) |
|---------|--------------------------|----------------------------|-----------------|-------------------|-------------------------------|---------------------------------|------------------------|--------------------------|
| 3d1     | 247,666                  | 0.51                       | 80,350          | 0.17              | 1,422,250                     | 2.92                            | 94.28                  | 94.53                    |
| 3d2     | 285,374                  | 0.62                       | 119,458         | 0.26              | 1,682,376                     | 3.65                            | 94.03                  | 94.36                    |
| 3d3     | 258,734                  | 0.56                       | 104,576         | 0.23              | 1,955,898                     | 4.21                            | 94.7                   | 95                       |
| 6d1     | 167,088                  | 0.36                       | 107,152         | 0.23              | 1,228,146                     | 2.65                            | 92.78                  | 92.99                    |
| 6d2     | 168,518                  | 0.35                       | 99,602          | 0.21              | 1,378,994                     | 2.86                            | 92.36                  | 92.55                    |
| 6d3     | 218,044                  | 0.51                       | 74,086          | 0.17              | 372,114                       | 0.87                            | 91.48                  | 91.7                     |
| 9d1     | 272,842                  | 0.59                       | 113,518         | 0.24              | 774,844                       | 1.68                            | 92.17                  | 92.46                    |
| 9d2     | 304,430                  | 0.72                       | 115,352         | 0.27              | 578,148                       | 1.38                            | 92.22                  | 92.56                    |
| 9d3     | 373,630                  | 0.86                       | 72,444          | 0.17              | 1,463,248                     | 3.39                            | 91.34                  | 91.8                     |
| 12d1    | 294,770                  | 0.62                       | 137,014         | 0.29              | 577,152                       | 1.22                            | 91.66                  | 91.95                    |
| 12d2    | 231,074                  | 0.51                       | 117,782         | 0.26              | 617,152                       | 1.37                            | 92.32                  | 92.58                    |
| 12d3    | 287,424                  | 0.63                       | 277,632         | 0.61              | 667,408                       | 1.46                            | 92.83                  | 93.23                    |
| 15d1    | 223,532                  | 0.47                       | 41,360          | 0.09              | 1,052,474                     | 2.23                            | 94.46                  | 94.67                    |
| 15d2    | 250,698                  | 0.5                        | 90,734          | 0.18              | 1,994,356                     | 3.96                            | 94.05                  | 94.31                    |
| 15d3    | 217,032                  | 0.44                       | 38,672          | 0.08              | 1,686,662                     | 3.43                            | 94.47                  | 94.67                    |
| Total   | 3,800,856                | 8                          | 1,589,732       | 3                 | 17,451,222                    | 37                              | 1,395                  | 1,399                    |
| Average | 253,390                  | 1                          | 105,982         | 0                 | 1,163,415                     | 2                               | 93.01                  | 93.29067                 |

**Table S2.** The summary of RNA-seq data from 5 samples.

| Treatments           | Rep. | Raw Reads Number | Clean Reads |           | Mapped reads |             |
|----------------------|------|------------------|-------------|-----------|--------------|-------------|
|                      |      |                  | Total       | Raw reads | Total        | Clean reads |
| 3 <sup>th</sup> day  | 1    | 48,694,098       | 46,943,832  | 96.41     | 45,610,346   | 97.16       |
|                      | 2    | 46,132,964       | 44,045,756  | 95.48     | 42,853,129   | 97.29       |
|                      | 3    | 46,500,864       | 44,181,656  | 95.01     | 43,061,345   | 97.46       |
| 6 <sup>th</sup> day  | 1    | 46,396,834       | 44,894,448  | 96.76     | 26,230,319   | 58.43       |
|                      | 2    | 48,263,138       | 46,616,024  | 96.59     | 38,260,921   | 82.08       |
|                      | 3    | 42,955,580       | 42,291,336  | 98.45     | 30,140,380   | 71.27       |
| 9 <sup>th</sup> day  | 1    | 46,271,222       | 45,110,018  | 97.49     | 25,308,591   | 56.10       |
|                      | 2    | 41,973,028       | 40,975,098  | 97.62     | 19,843,293   | 48.43       |
|                      | 3    | 43,182,142       | 41,272,820  | 95.58     | 17,491,240   | 42.38       |
| 12 <sup>th</sup> day | 1    | 47,160,676       | 46,151,740  | 97.86     | 41,313,003   | 89.52       |
|                      | 2    | 45,191,892       | 44,225,884  | 97.86     | 33,912,174   | 76.68       |
|                      | 3    | 45,729,560       | 44,497,096  | 97.31     | 40,747,833   | 91.57       |
| 15 <sup>th</sup> day | 1    | 47,125,420       | 45,808,054  | 97.20     | 44,612,998   | 97.39       |
|                      | 2    | 50,318,454       | 47,982,666  | 95.36     | 46,082,876   | 96.04       |
|                      | 3    | 49,164,158       | 47,221,792  | 96.05     | 45,765,333   | 96.92       |
| Total                | 15   | 695,060,030      | 672,218,220 | 1,451     | 541,233,781  | 1198.72     |
| Average              | 3    | 46,337,335       | 44,814,548  | 97        | 36,082,252   | 79.91466667 |

**Figure S1.** Visualization of the DEGs by volcano plot.

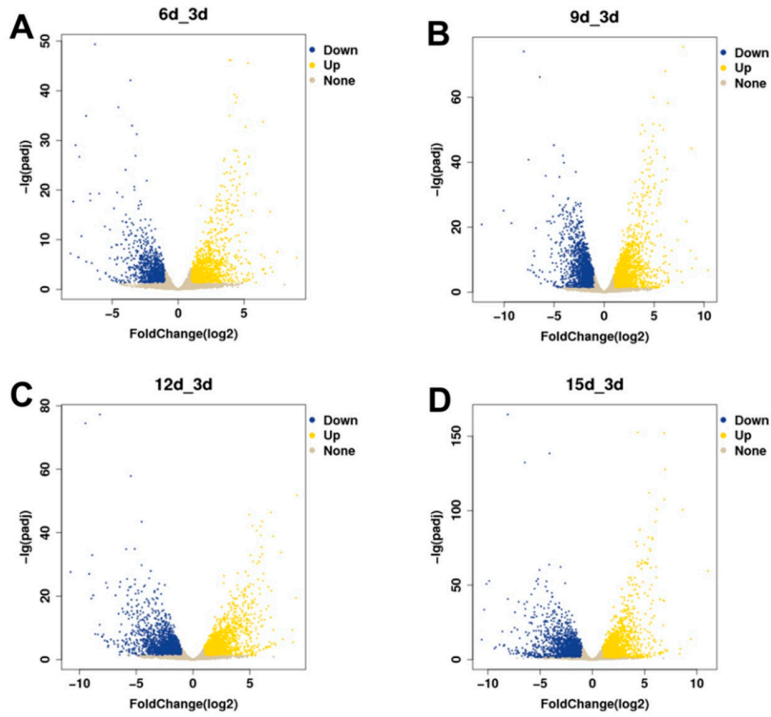

**Table S3.** Gene ontology classification of DEGs

| 6d-3d              |                            |          |            |            |              |
|--------------------|----------------------------|----------|------------|------------|--------------|
| Ontology           | Term_name                  | Up_Count | Up_Percent | Down_Count | Down_Percent |
| cellular_component | extracellular region       | 34       | 2.84       | 62         | 5.21         |
| cellular_component | cell                       | 3        | 0.25       | 2          | 0.17         |
| cellular_component | nucleoid                   | 1        | 0.08       | 2          | 0.17         |
| cellular_component | membrane                   | 132      | 11.03      | 107        | 8.98         |
| cellular_component | cell junction              | 1        | 0.08       | 6          | 0.5          |
| cellular_component | membrane-enclosed lumen    | 8        | 0.67       | 17         | 1.43         |
| cellular_component | protein-containing complex | 55       | 4.59       | 103        | 8.65         |
| cellular_component | organelle                  | 233      | 19.47      | 238        | 19.98        |
| cellular_component | other organism part        | 1        | 0.08       | 2          | 0.17         |
| cellular_component | extracellular region part  | 7        | 0.58       | 15         | 1.26         |
| cellular_component | organelle part             | 137      | 11.45      | 160        | 13.43        |
| cellular_component | membrane part              | 172      | 14.37      | 163        | 13.69        |
| cellular_component | synapse part               | 3        | 0.25       | 5          | 0.42         |
| cellular_component | cell part                  | 384      | 32.08      | 452        | 37.95        |
| cellular_component | synapse                    | 0        | 0          | 2          | 0.17         |
| cellular_component | supramolecular complex     | 2        | 0.17       | 13         | 1.09         |
| Total              |                            | 1173     | 97.99      | 1349       | 113.27       |
| biological_process | reproduction               | 9        | 0.75       | 0          | 0            |

| biological_process | cell killing                                  | 2        | 0.17       | 0          | 0            |
|--------------------|-----------------------------------------------|----------|------------|------------|--------------|
| biological_process | immune system process                         | 2        | 0.17       | 4          | 0.34         |
| biological_process | behavior                                      | 1        | 0.08       | 2          | 0.17         |
| biological_process | metabolic process                             | 280      | 23.39      | 439        | 36.86        |
| biological_process | cell proliferation                            | 1        | 0.08       | 0          | 0            |
| biological_process | carbohydrate utilization                      | 0        | 0          | 1          | 0.08         |
| biological_process | cellular process                              | 334      | 27.9       | 459        | 38.54        |
| biological_process | nitrogen utilization                          | 1        | 0.08       | 0          | 0            |
| biological_process | reproductive process                          | 24       | 2.01       | 11         | 0.92         |
| biological_process | biological adhesion                           | 1        | 0.08       | 0          | 0            |
| biological_process | signaling                                     | 3        | 0.25       | 2          | 0.17         |
| biological_process | multicellular organismal process              | 13       | 1.09       | 12         | 1.01         |
| biological_process | developmental process                         | 32       | 2.67       | 25         | 2.1          |
| biological_process | growth                                        | 12       | 1          | 3          | 0.25         |
| biological_process | locomotion                                    | 3        | 0.25       | 4          | 0.34         |
| biological_process | rhythmic process                              | 1        | 0.08       | 2          | 0.17         |
| biological_process | response to stimulus                          | 67       | 5.6        | 46         | 3.86         |
| biological_process | localization                                  | 104      | 8.69       | 109        | 9.15         |
| biological_process | multi-organism process                        | 30       | 2.51       | 38         | 3.19         |
| biological_process | biological regulation                         | 128      | 10.69      | 90         | 7.56         |
| biological_process | cellular component organization or biogenesis | 73       | 6.1        | 82         | 6.88         |
| biological_process | cell aggregation                              | 2        | 0.17       | 1          | 0.08         |
| biological_process | detoxification                                | 4        | 0.33       | 10         | 0.84         |
| Total              |                                               | 1127     | 94.14      | 1340       | 112.51       |
| molecular_function | catalytic activity                            | 368      | 30.74      | 560        | 47.02        |
| molecular_function | structural molecule activity                  | 7        | 0.58       | 67         | 5.63         |
| molecular_function | transporter activity                          | 74       | 6.18       | 68         | 5.71         |
| molecular_function | binding                                       | 331      | 27.65      | 384        | 32.24        |
| molecular_function | antioxidant activity                          | 4        | 0.33       | 7          | 0.59         |
| molecular_function | translation regulator activity                | 0        | 0          | 1          | 0.08         |
| molecular_function | nutrient reservoir activity                   | 1        | 0.08       | 1          | 0.08         |
| molecular_function | molecular transducer activity                 | 5        | 0.42       | 1          | 0.08         |
| molecular_function | toxin activity                                | 2        | 0.17       | 2          | 0.17         |
| molecular_function | molecular function regulator                  | 15       | 1.25       | 13         | 1.09         |
| molecular_function | molecular carrier activity                    | 0        | 0          | 1          | 0.08         |
| molecular_function | transcription regulator activity              | 44       | 3.68       | 15         | 1.26         |
| Total              |                                               | 851      | 71.08      | 1120       | 94.03        |
| 9d-3d              |                                               |          |            |            |              |
| Ontology           | Term_name                                     | Up_Count | Up_Percent | Down_Count | Down_Percent |
| cellular_componen  | extracellular region                          | 56       | 3.19       | 127        | 6.47         |
| cellular_componen  | cell                                          | 4        | 0.23       | 3          | 0.15         |
| cellular_componen  | nucleoid                                      | 1        | 0.06       | 4          | 0.2          |

|                    |                                                  |      |        |      |        |
|--------------------|--------------------------------------------------|------|--------|------|--------|
| cellular_componen  | membrane                                         | 184  | 10.47  | 199  | 10.14  |
| cellular_componen  | cell junction                                    | 7    | 0.4    | 8    | 0.41   |
| cellular_componen  | membrane-enclosed lumen                          | 7    | 0.4    | 42   | 2.14   |
| cellular_componen  | protein-containing complex                       | 119  | 6.77   | 221  | 11.26  |
| cellular_componen  | organelle                                        | 394  | 22.41  | 453  | 23.08  |
| cellular_componen  | other organism part                              | 1    | 0.06   | 2    | 0.1    |
| cellular_componen  | extracellular region part                        | 13   | 0.74   | 27   | 1.38   |
| cellular_componen  | organelle part                                   | 232  | 13.2   | 306  | 15.59  |
| cellular_componen  | membrane part                                    | 237  | 13.48  | 283  | 14.42  |
| cellular_componen  | synapse part                                     | 8    | 0.46   | 6    | 0.31   |
| cellular_componen  | cell part                                        | 611  | 34.76  | 836  | 42.59  |
| cellular_componen  | synapse                                          | 5    | 0.28   | 4    | 0.2    |
| cellular_componen  | supramolecular complex                           | 3    | 0.17   | 20   | 1.02   |
| Total              |                                                  | 1882 | 107.08 | 2541 | 129.46 |
| biological_process | reproduction                                     | 12   | 0.68   | 4    | 0.2    |
| biological_process | cell killing                                     | 3    | 0.17   | 0    | 0      |
| biological_process | immune system process                            | 3    | 0.17   | 9    | 0.46   |
| biological_process | behavior                                         | 4    | 0.23   | 1    | 0.05   |
| biological_process | metabolic process                                | 449  | 25.54  | 738  | 37.6   |
| biological_process | cell proliferation                               | 2    | 0.11   | 0    | 0      |
| biological_process | carbohydrate utilization                         | 0    | 0      | 1    | 0.05   |
| biological_process | cellular process                                 | 534  | 30.38  | 780  | 39.74  |
| biological_process | nitrogen utilization                             | 2    | 0.11   | 0    | 0      |
| biological_process | reproductive process                             | 43   | 2.45   | 24   | 1.22   |
| biological_process | biological adhesion                              | 5    | 0.28   | 0    | 0      |
| biological_process | signaling                                        | 3    | 0.17   | 2    | 0.1    |
| biological_process | multicellular organismal process                 | 18   | 1.02   | 16   | 0.82   |
| biological_process | developmental process                            | 55   | 3.13   | 39   | 1.99   |
| biological_process | growth                                           | 18   | 1.02   | 6    | 0.31   |
| biological_process | locomotion                                       | 4    | 0.23   | 5    | 0.25   |
| biological_process | rhythmic process                                 | 1    | 0.06   | 1    | 0.05   |
| biological_process | response to stimulus                             | 108  | 6.14   | 88   | 4.48   |
| biological_process | localization                                     | 157  | 8.93   | 193  | 9.83   |
| biological_process | multi-organism process                           | 47   | 2.67   | 62   | 3.16   |
| biological_process | biological regulation                            | 239  | 13.59  | 168  | 8.56   |
| biological_process | cellular component<br>organization or biogenesis | 126  | 7.17   | 143  | 7.28   |
| biological_process | cell aggregation                                 | 3    | 0.17   | 1    | 0.05   |
| biological_process | detoxification                                   | 6    | 0.34   | 19   | 0.97   |
| Total              |                                                  | 1842 | 104.76 | 2300 | 117.17 |
| molecular_function | catalytic activity                               | 502  | 28.56  | 918  | 46.77  |
| molecular_function | structural molecule activity                     | 9    | 0.51   | 90   | 4.58   |
| molecular_function | transporter activity                             | 98   | 5.57   | 122  | 6.21   |

|                    |                                  |                 |                   |                   |                     |
|--------------------|----------------------------------|-----------------|-------------------|-------------------|---------------------|
| molecular_function | binding                          | 504             | 28.67             | 664               | 33.83               |
| molecular_function | antioxidant activity             | 8               | 0.46              | 13                | 0.66                |
| molecular_function | protein tag                      | 0               | 0                 | 3                 | 0.15                |
| molecular_function | translation regulator activity   | 0               | 0                 | 1                 | 0.05                |
| molecular_function | nutrient reservoir activity      | 0               | 0                 | 3                 | 0.15                |
| molecular_function | molecular transducer activity    | 6               | 0.34              | 4                 | 0.2                 |
| molecular_function | toxin activity                   | 3               | 0.17              | 4                 | 0.2                 |
| molecular_function | molecular function regulator     | 25              | 1.42              | 23                | 1.17                |
| molecular_function | molecular carrier activity       | 1               | 0.06              | 1                 | 0.05                |
| molecular_function | transcription regulator activity | 90              | 5.12              | 22                | 1.12                |
| Total              |                                  | 1246            | 70.88             | 1868              | 95.14               |
| 12d-3d             |                                  |                 |                   |                   |                     |
| <b>Ontology</b>    | <b>Term_name</b>                 | <b>Up_Count</b> | <b>Up_Percent</b> | <b>Down_Count</b> | <b>Down_Percent</b> |
| cellular_component | extracellular region             | 43              | 2.22              | 108               | 5.27                |
| cellular_component | cell                             | 5               | 0.26              | 4                 | 0.2                 |
| cellular_component | nucleoid                         | 0               | 0                 | 6                 | 0.29                |
| cellular_component | membrane                         | 201             | 10.38             | 208               | 10.15               |
| cellular_component | cell junction                    | 5               | 0.26              | 9                 | 0.44                |
| cellular_component | membrane-enclosed lumen          | 12              | 0.62              | 45                | 2.2                 |
| cellular_component | protein-containing complex       | 225             | 11.62             | 213               | 10.39               |
| cellular_component | organelle                        | 549             | 28.36             | 471               | 22.98               |
| cellular_component | other organism part              | 1               | 0.05              | 2                 | 0.1                 |
| cellular_component | extracellular region part        | 11              | 0.57              | 22                | 1.07                |
| cellular_component | organelle part                   | 351             | 18.13             | 321               | 15.66               |
| cellular_component | membrane part                    | 249             | 12.86             | 285               | 13.9                |
| cellular_component | synapse part                     | 5               | 0.26              | 7                 | 0.34                |
| cellular_component | cell part                        | 807             | 41.68             | 845               | 41.22               |
| cellular_component | synapse                          | 3               | 0.15              | 5                 | 0.24                |
| cellular_component | supramolecular complex           | 5               | 0.26              | 21                | 1.02                |
| Total              |                                  | 2472            | 127.68            | 2572              | 125.47              |
| biological_process | reproduction                     | 10              | 0.52              | 3                 | 0.15                |
| biological_process | cell killing                     | 2               | 0.1               | 0                 | 0                   |
| biological_process | immune system process            | 6               | 0.31              | 9                 | 0.44                |
| biological_process | behavior                         | 3               | 0.15              | 2                 | 0.1                 |
| biological_process | metabolic process                | 555             | 28.67             | 748               | 36.49               |
| biological_process | cell proliferation               | 6               | 0.31              | 0                 | 0                   |
| biological_process | carbohydrate utilization         | 0               | 0                 | 1                 | 0.05                |
| biological_process | cellular process                 | 681             | 35.18             | 786               | 38.34               |
| biological_process | nitrogen utilization             | 3               | 0.15              | 0                 | 0                   |
| biological_process | reproductive process             | 55              | 2.84              | 29                | 1.41                |
| biological_process | biological adhesion              | 5               | 0.26              | 2                 | 0.1                 |
| biological_process | signaling                        | 8               | 0.41              | 1                 | 0.05                |

| biological_process | multicellular organismal process | 20       | 1.03       | 17         | 0.83         |
|--------------------|----------------------------------|----------|------------|------------|--------------|
| biological_process | developmental process            | 62       | 3.2        | 34         | 1.66         |
| biological_process | growth                           | 23       | 1.19       | 9          | 0.44         |
| biological_process | locomotion                       | 4        | 0.21       | 4          | 0.2          |
| biological_process | rhythmic process                 | 1        | 0.05       | 2          | 0.1          |
| biological_process | response to stimulus             | 145      | 7.49       | 95         | 4.63         |
| biological_process | localization                     | 176      | 9.09       | 208        | 10.15        |
| biological_process | multi-organism process           | 53       | 2.74       | 61         | 2.98         |
| biological_process | biological regulation            | 337      | 17.41      | 185        | 9.02         |
| biological_process | cellular component               | 181      | 9.35       | 156        | 7.61         |
| biological_process | cell aggregation                 | 3        | 0.15       | 1          | 0.05         |
| biological_process | detoxification                   | 5        | 0.26       | 19         | 0.93         |
| Total              |                                  | 2344     | 121.07     | 2372       | 115.73       |
| molecular_function | catalytic activity               | 527      | 27.22      | 923        | 45.02        |
| molecular_function | structural molecule activity     | 10       | 0.52       | 87         | 4.24         |
| molecular_function | transporter activity             | 98       | 5.06       | 126        | 6.15         |
| molecular_function | binding                          | 591      | 30.53      | 660        | 32.2         |
| molecular_function | antioxidant activity             | 8        | 0.41       | 18         | 0.88         |
| molecular_function | protein tag                      | 0        | 0          | 4          | 0.2          |
| molecular_function | translation regulator activity   | 1        | 0.05       | 1          | 0.05         |
| molecular_function | nutrient reservoir activity      | 2        | 0.1        | 1          | 0.05         |
| molecular_function | molecular transducer activity    | 8        | 0.41       | 3          | 0.15         |
| molecular_function | toxin activity                   | 2        | 0.1        | 2          | 0.1          |
| molecular_function | molecular function regulator     | 46       | 2.38       | 23         | 1.12         |
| molecular_function | molecular carrier activity       | 1        | 0.05       | 1          | 0.05         |
| molecular_function | transcription regulator activity | 127      | 6.56       | 25         | 1.22         |
| Total              |                                  | 1421     | 73.39      | 1874       | 91.43        |
| 15d-3d             |                                  |          |            |            |              |
| Ontology           | Term_name                        | Up_Count | Up_Percent | Down_Count | Down_Percent |
| cellular_component | extracellular region             | 41       | 2.14       | 147        | 6.95         |
| cellular_component | cell                             | 2        | 0.1        | 3          | 0.14         |
| cellular_component | nucleoid                         | 0        | 0          | 2          | 0.09         |
| cellular_component | membrane                         | 189      | 9.87       | 214        | 10.12        |
| cellular_component | cell junction                    | 2        | 0.1        | 9          | 0.43         |
| cellular_component | membrane-enclosed lumen          | 11       | 0.57       | 32         | 1.51         |
| cellular_component | protein-containing complex       | 178      | 9.3        | 176        | 8.33         |
| cellular_component | organelle                        | 471      | 24.61      | 460        | 21.76        |
| cellular_component | other organism part              | 1        | 0.05       | 1          | 0.05         |
| cellular_component | extracellular region part        | 5        | 0.26       | 26         | 1.23         |
| cellular_component | organelle part                   | 289      | 15.1       | 292        | 13.81        |
| cellular_component | membrane part                    | 236      | 12.33      | 274        | 12.96        |
| cellular_component | synapse part                     | 4        | 0.21       | 9          | 0.43         |

|                    |                                  |      |        |      |        |
|--------------------|----------------------------------|------|--------|------|--------|
| cellular_component | cell part                        | 706  | 36.89  | 814  | 38.51  |
| cellular_component | synapse                          | 3    | 0.16   | 3    | 0.14   |
| cellular_component | supramolecular complex           | 3    | 0.16   | 19   | 0.9    |
| Total              |                                  | 2141 | 111.85 | 2481 | 117.36 |
| biological_process | reproduction                     | 10   | 0.52   | 6    | 0.28   |
| biological_process | cell killing                     | 2    | 0.1    | 0    | 0      |
| biological_process | immune system process            | 5    | 0.26   | 7    | 0.33   |
| biological_process | behavior                         | 2    | 0.1    | 2    | 0.09   |
| biological_process | metabolic process                | 499  | 26.07  | 708  | 33.49  |
| biological_process | cell proliferation               | 2    | 0.1    | 1    | 0.05   |
| biological_process | carbohydrate utilization         | 0    | 0      | 1    | 0.05   |
| biological_process | cellular process                 | 602  | 31.45  | 766  | 36.23  |
| biological_process | nitrogen utilization             | 4    | 0.21   | 0    | 0      |
| biological_process | reproductive process             | 48   | 2.51   | 31   | 1.47   |
| biological_process | biological adhesion              | 3    | 0.16   | 0    | 0      |
| biological_process | signaling                        | 6    | 0.31   | 3    | 0.14   |
| biological_process | multicellular organismal process | 15   | 0.78   | 16   | 0.76   |
| biological_process | developmental process            | 54   | 2.82   | 49   | 2.32   |
| biological_process | growth                           | 20   | 1.04   | 10   | 0.47   |
| biological_process | locomotion                       | 5    | 0.26   | 4    | 0.19   |
| biological_process | rhythmic process                 | 0    | 0      | 3    | 0.14   |
| biological_process | response to stimulus             | 139  | 7.26   | 109  | 5.16   |
| biological_process | localization                     | 165  | 8.62   | 183  | 8.66   |
| biological_process | multi-organism process           | 52   | 2.72   | 67   | 3.17   |
| biological_process | biological regulation            | 282  | 14.73  | 195  | 9.22   |
| biological_process | cellular component               | 141  | 7.37   | 162  | 7.66   |
| biological_process | cell aggregation                 | 5    | 0.26   | 1    | 0.05   |
| biological_process | detoxification                   | 7    | 0.37   | 20   | 0.95   |
| Total              |                                  | 2068 | 108.02 | 2344 | 110.88 |
| molecular_function | catalytic activity               | 524  | 27.38  | 923  | 43.66  |
| molecular_function | structural molecule activity     | 9    | 0.47   | 85   | 4.02   |
| molecular_function | transporter activity             | 102  | 5.33   | 103  | 4.87   |
| molecular_function | binding                          | 566  | 29.57  | 653  | 30.89  |
| molecular_function | antioxidant activity             | 9    | 0.47   | 23   | 1.09   |
| molecular_function | protein tag                      | 0    | 0      | 4    | 0.19   |
| molecular_function | translation regulator activity   | 1    | 0.05   | 0    | 0      |
| molecular_function | nutrient reservoir activity      | 2    | 0.1    | 2    | 0.09   |
| molecular_function | molecular transducer activity    | 10   | 0.52   | 4    | 0.19   |
| molecular_function | toxin activity                   | 3    | 0.16   | 3    | 0.14   |
| molecular_function | molecular function regulator     | 28   | 1.46   | 25   | 1.18   |
| molecular_function | molecular carrier activity       | 1    | 0.05   | 2    | 0.09   |
| molecular_function | transcription regulator activity | 120  | 6.27   | 27   | 1.28   |
| Total              |                                  | 1375 | 71.83  | 1854 | 87.69  |

**Tables S4.** Reverse transcription of total RNA to cDNA and genomic DNA removal reaction.

| Reagent                       | Usage amount/ $\mu$ l         |
|-------------------------------|-------------------------------|
| 5 $\times$ gDNA Eraser Buffer | 2.0                           |
| gDNA Eraser                   | 1.0                           |
| Total RNA                     | 20 reaction system <1 $\mu$ g |
| RNase Free H <sub>2</sub> O   | 10                            |

The reagent-added samples were reacted at 42°C for 2 min and stored at 4°C.

**Tables S5.** Reverse transcription reaction when master mix prepare according to the amount of the reaction number +1.

| Reagent                                          | Usage amount/ $\mu$ l |
|--------------------------------------------------|-----------------------|
| 5 $\times$ PrimerScript Buffer 2 (for Real Time) | 4.0                   |
| PrimerScript RT Enzyme Mix I                     | 1.0                   |
| RT Primer Mix                                    | 1.0                   |
| Step (1) reaction solution                       | 10.0                  |
| RNase Free H <sub>2</sub> O                      | 2.0                   |

The reagent-added sample was reacted at 37°C for 15 min, then reacted at 85°C for 5 sec, and finally stored at -20°C.

**Tables S6.** Fluorescence quantification to reaction system with Takara kit, instrument Bio-Rad CFX96.

| Reagent                          | Usage amount/ $\mu$ l |
|----------------------------------|-----------------------|
| PCR F-Primer (10 $\mu$ mol/l)    | 0.4                   |
| PCR R-Primer (10 $\mu$ mol/l)    | 0.4                   |
| cDNA                             | 1.0                   |
| TB Green <i>Premix Ex Taq</i> II | 10.0                  |
| RNase Free H <sub>2</sub> O      | 8.2                   |
